# Supplementary material for: Hair-follicle-associated pluripotent stem cells derived from cryopreserved intact human hair follicles sustain multilineage differentiation potential
Source: PubMed Central journal article supplement (PMC6597789; doi:10.1038/s41598-019-45740-9), 2019-06-27
Supplement: 41598_2019_45740_MOESM1_ESM.pdf [file 41598_2019_45740_MOESM1_ESM.pdf]

# **Hair-follicle-associated pluripotent stem cells derived from cryopreserved intact human hair follicle sustain multilineage differentiation potential**

Koya Obara, Natsuko Tohgi, Sumiyuki Mii, Yuko Hamada, Nobuko Arakawa, Ryoichi Aki, Shree Ram Singh, Robert M. Hoffman, and Yasuyuki Amoh

Full-length blots related to Figure 6

nestin →

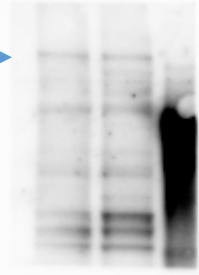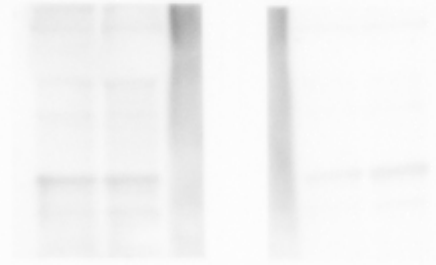

oct →

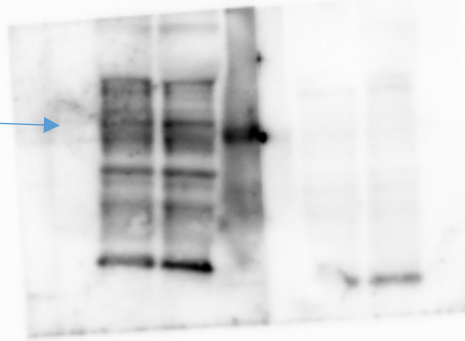

← GAPDH

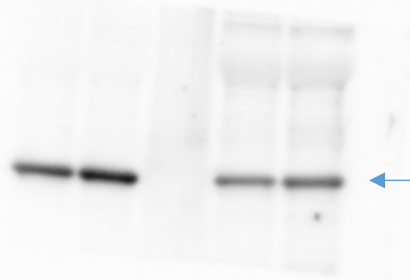

nestin

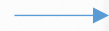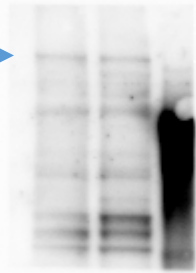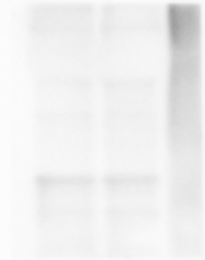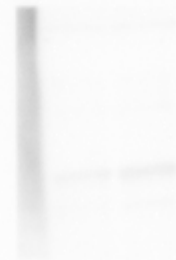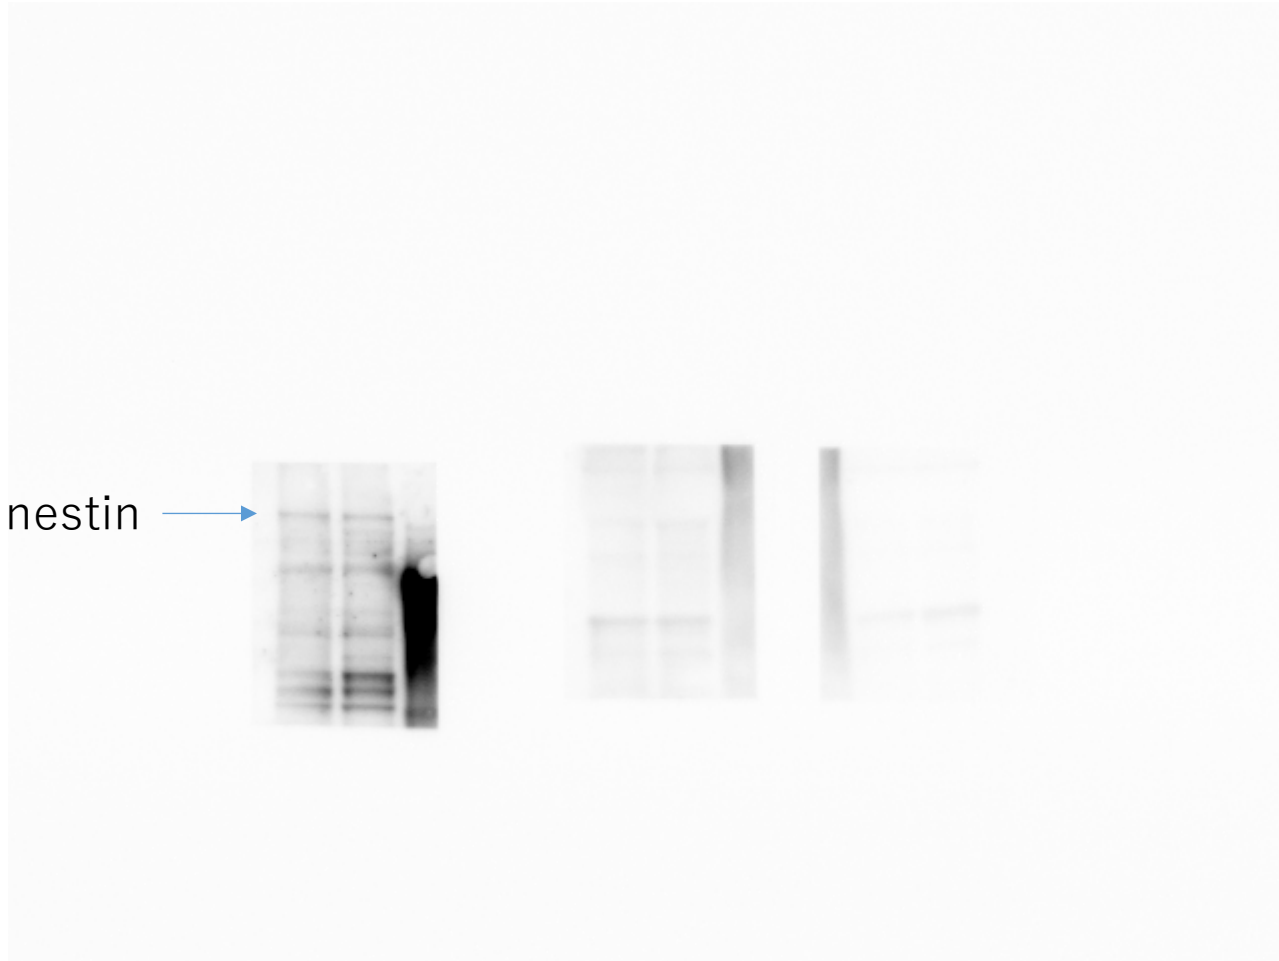

oct

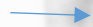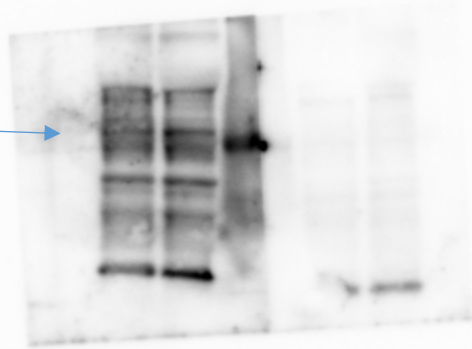

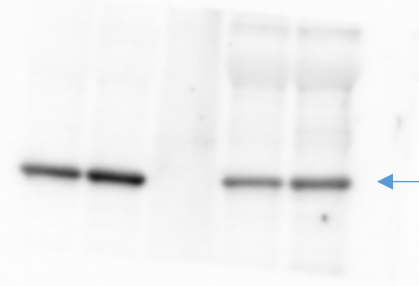

← GAPDH
